# Supplementary material for: Phase-dependent activity-stability relationships of molybdenum sulfide hydrogen evolution electrocatalysts
Source: Research Square preprint supplement (doi:10.21203/rs.3.rs-3152237/v1), 2023-07-17
Supplement: Supplementary file 1 [file 46b7b511ebd7f745be949c66.docx]

**Supporting Information**

Phase-dependent activity-stability relationships of molybdenum sulfide hydrogen evolution electrocatalysts

*Daniel Escalera-Lópeza,*, Christian Iffelsbergerb, Matej Zlatara,c, Nik Maseljd, Chuyen Van Phama, Primož Jovanovičd, Nejc Hodnikd, Simon Thielea,c, Martin Pumerab,f,g,h,*

*Serhiy Cherevkoa,**

aHelmholtz-Institute Erlangen-Nürnberg for Renewable Energy (IEK-11),

Forschungszentrum Jülich GmbH, Erlangen, Germany

Cauerstrasse 1, 91058 Erlangen, Germany

bFuture Energy and Innovation Technology, Central European Institute of Technology, Brno University of Technology, Purkiňova 656/123, 61200 Brno, Czech Republic

cDepartment of Chemical and Biological Engineering, Friedrich-Alexander-Universität Erlangen-Nürnberg, Cauerstrasse 1, 91058 Erlangen, Germany

dDepartment of Materials Chemistry, National Institute of Chemistry, Hajdrihova 19, 1000 Ljubljana, Slovenia

eFaculty of Chemistry and Chemical Technology, University of Ljubljana, Večna pot 113, 1000 Ljubljana, Slovenia

fEnergy Research Institute @ NTU (ERI@N), Research Techno Plaza, X-Frontier Block, Level 5, 50 Nanyang Drive, Singapore

gDepartment of Medical Research, China Medical University Hospital, China Medical University, No. 91 Hsueh-Shih Road, Taichung 40402, Taiwan

hDepartment of Chemical and Biomolecular Engineering, Yonsei University, 50 Yonsei-ro, No. 91 Hsueh-Shih Road, Seodaemun-gu, Seoul 03722, Korea

[*d.escalera@fz-juelich.de*](mailto:d.escalera@fz-juelich.de)

[*s.cherevko@fz-juelich.de*](mailto:s.cherevko@fz-juelich.de)

**Section S1: Physical characterization of cathodic and anodic MoSx electrodeposits**

Physicochemical characterization of the freshly-prepared anodically (a-MoS3-x) and cathodically (c-MoS2) electrodeposited thin films were performed with SEM and XPS. The SEM characterization of a-MoS3-x and c-MoS2 is depicted in Figure S1A and B, respectively. Both electrodeposits show a good MoSx coverage of the glassy carbon substrate, with small grain sizes (<100 nm) comparable to previous reports on electrochemically deposited MoSx1, 2. The XPS survey spectra of a-MoS3-x and c-MoS2 are shown in Figure S1C and D, and confirm the presence of Mo and S in both deposits along with N from the precursor and O and C arising from both substrate and environment exposure3. Further integration of the S and Mo survey spectra yielded S-to-Mo ratios of 2.8 for a-MoS3-x and 1.5 for c-MoS2 . The high-resolution spectra of the Mo 3d region for the anodic and cathodic deposit are shown in Figure S1E and Figure S1F, respectively. The deconvoluted peaks at binding energies of 226.4 eV (Figure S1F) and 226.1, 227.4 and 229.0 eV (Figure S1E) were assigned to the S 2s peaks in accordance with literature4, 5. The deconvolution revealed for both deposits three doublets for Mo with binding energies for the Mo 3d5/2 signals of 229.3, 230.1 and 231.1 eV for the anodic deposit and 229.1, 230.4 and 232.2 eV for the cathodic deposit. These three doublets were assigned to Mo(IV), Mo(V) and Mo(VI), respectively5, 6. The quantification shows in agreement with literature that in both deposits Mo(IV) is the dominant oxidation state with 72 at. % in the anodic, and 50 at. % in the cathodic MoSx5, 7. The presence of Mo(VI) in the deposits points on the presence of MoO35. The comparable high amount of Mo(VI) in the cathodic deposition gives a possible explanation for the low S-to-Mo ratio found from the survey spectrum. The recalculation of the S-to-Mo ratio results in a value of 1.9. A possible explanation for the presence Mo(V) could be the formation of intermediate products7, 8.

The high-resolution spectra of the S 2p region for the anodic deposition is depicted in Figure S1G for the cathodic deposition in Figure S1H. For the deconvolution of S 2p region in the anodic deposit, three doublets with the binding energies of the S 2p1/3, and S 2p1/2 signals of 163.5, 164.7 eV and 163.2, 164.4 eV and 161.9 eV, 163.1 eV were respectively attributed to S(0), S2- and S22- species9. For the cathodic deposit, two doublets with the binding energies of the S 2p1/3, S 2p1/2 signals were located at 163.1, 164.3 eV and at 161.8 eV, 162.9 eV were assigned to S2- and S22- species. The exact quantification of the S(0), S2- and S22- is not possible because of overlapping signals of apical, terminal and bridging S2- and S22-species7. Nevertheless, the appearance and shape of the high-resolution XPS spectra for Mo 3d and S 2p are consistent to previously reported spectra measured in MoS3 and MoS210, 11. Therefore, the SEM and XPS investigations confirm the electrochemical formation of MoS2 and MoS3-x.





**Figure S1**: Physicochemical characterization of the anodically (A, C, E, G) and cathodically (B, D, F, H) electrodeposited MoSx. A, B) Show the scanning electron micrographs, C, D) the XPS survey spectra, E, F) the XPS spectra of the Mo 3d region, and G, H) the XPS spectra of the S 2p region.








**Figure S2**. Top: Graphical representation of dissolution onset potentials of Mo (left, blue) and S (right, yellow) as a function of the LPL. Bottom: Side-by-side comparison of S dissolution onsets from ICP-MS and EC-MS data. Scan rate: 5 mV s-1.





**Figure S3**. Total integrated dissolution of Mo (first panel, blue) and S (second panel, yellow) and the corresponding experimental dissolution onset potentials of Mo (third panel) and S (fourth panel) as a function of the LPL. CVs recorded from 0 VRHE to LPLs in the range -0.1≤EUPL≤-0.5 V. Scan rate: 5 mV s-1.








**Figure S4.** Total dissolution data for Mo (top) and S (bottom) integrated at each consecutive -1 mA cm-2geom HER holds (left, “start-up” cycle) and 0 VRHE (right, “shutdown” cycle). Labels: a-MoS3-x (light blue/yellow) and c-MoS2 (dark blue/yellow).





**Figure S5**. Online ICP-MS dissolution data obtained for Mo (blue) and S (yellow) in pristine (left) and N-CNT anchored (right) [Mo3S13]2- catalyst during start-up/shut-down stress tests. Preconditioning: 150 CVs, 0 to -0.20 VRHE, 100 mV s-1.





**Figure S6.** Compilation of S-numbers(e-) obtained during 0V vs. RHE holds for Mo (left) and hold-dependent HER activity (right).











**Figure S7.** Top panel: total dissolution data for Mo (left) and S (right) integrated at each consecutive -1 mA cm-2geom HER holds. Compilation of S-numbers obtained for a-MoS3-x, [Mo3S13]2- and [Mo3S13]-N-CNTs during start-up/shut-down stress tests for Mo (middle panel) and S (bottom panel) under HER conditions (left) and S-numbers(e-) during 0V vs. RHE holds (right).

**Section S2. Impact of anodic potential in MoSx stability**

Voltage reversal from HER operation has been demonstrated here to severely compromise MoSx stability regardless of the phase. If PEMWEs were to be coupled with intermittent renewable energies that can lead to shutdowns with loss of potential control, it is paramount to evaluate the effect of anodic potentials in the stability of MoSx, as no dedicated literature is available. To do so, the stability of MoSx-based catalysts under anodic potentials was evaluated by recording sequential CVs on the pristine MoSx catalysts from 0 VRHE to UPLs in the range 0.7 – 1.5 V, where each successive cycle incremented its UPL by 200 mV.

When directly comparing *a*-MoS3-x and *c*-MoS2 electrodeposited thin films there are stark differences, observed once both total Mo and S dissolution and their corresponding dissolution onset potentials were plotted vs. the UPLs. First, the integrated Mo dissolution in *a*-MoS3-x is 10 times higher than *c*-MoS2 at any given UPL (Figure S8, top panel). Second, S dissolution can only be clearly observed in *a*-MoS3-x, at potentials beyond 1.1 VRHE and is ca. 3 orders of magnitude lower than that of Mo.





**Figure S8**. Total integrated dissolution (top) of Mo (blue) and S (yellow) and the corresponding experimental dissolution onset potentials (bottom) for *a*-MoS3-x and *c*-MoS2 and as a function of the UPL. Scan rate: 5 mV s-1.

Dissolution onset potentials were additionally estimated for Mo and S (Figure S8, bottom panel). Interestingly, Mo dissolution onsets for pristine *a*-MoS3-x and *c*-MoS2 were similar (ca. 0.3 VRHE) but after successive electro-oxidative cycles these shifted to higher values for *c*-MoS2, in contrast with *a*-MoS3-x where they peaked at UPL= 1.3 VRHE (Mo onset ~0.9 VRHE). Below this UPL value, Mo onsets for *a*-MoS3-x are 150-200 mV lower than *c*-MoS2. S dissolution could only be found for *a*-MoS3-x at E >1.1 VRHE. The high potentials recorded during anodic S dissolution (1.2≤E≤2.05 VRHE) resemble the results obtained on S-coordinated single-atom Pt electrocatalysts, where a S onset dissolution potential of >1.1 VRHE was reported12. We could conclude that, as previously suggested, electro-oxidation pathways of *a*-MoS3-x and *c*-MoS2 present intrinsic differences. While *c*-MoS2 is more prone to oxidize (i.e. earlier dissolution onsets), its overall dissolution at anodic potentials is lower compared to *a*-MoS3-x, indicating a degree of surface passivation confirmed by the upward shift in Mo dissolution onsets. It is noteworthy to mention that *a*-MoS3-x is further destabilized once S loss is detected, indicating the formation of unstable undercoordinated MoxSy moieties beyond a specific UPL.

Analogous experiments performed on [Mo3S13]-based catalysts at equivalent loadings (ca. 60 μgcat cm-2) are compiled in Figures S9 and S10. Despite having an identical motif, [Mo3S13]-based catalysts presented different dissolved amounts and dissolution onsets of Mo per electro-oxidative cycle. The earliest Mo onset (0.37± 0.03 VRHE) and highest Mo dissolution (97±16 ng cm-2) were found for MoSx-N-CNT, and can be ascribed to higher Mo3S13 catalyst utilization and improved electron transfer properties by the highly-conducting, percolated N-CNT support. In line with our previous findings, S dissolution was not observed at the selected UPLs (Figure S8) but was present instead when performing anodic galvanostatic holds (Figure S11). Thus, the more compact yet poorly percolated network in *a*-MoS3-x would be less prone to be oxidized than the highly-dispersed Mo3S13 clusters in highly conducting N-CNTs.








**Figure S9.** Online ICP-MS dissolution data obtained for successive linear sweep voltammograms (LSVs) with varying upper potential limit (UPL) values for Mo (blue) and S (yellow). LSVs recorded from 0 VRHE to UPLs in the range 0.7≤EUPL≤1.5 (a-MoS3-x, [Mo3S13]2-, [Mo3S13]-N-CNTs). Scan rate: 5 mV s-1.





**Figure S10.** Total integrated dissolution (top) of Mo (blue) and S (yellow) and the corresponding experimental dissolution onset potentials (bottom) for the [Mo3S13]-based catalysts (a-MoS3-x, [Mo3S13]2 andMoSx-N-CNT) as a function of the UPL. Scan rate: 5 mV s-1.

Compared with the theoretical oxidation potential reported from both the Mo-S-O-H Pourbaix diagram (ca. 0.27 VRHE)13 and the recently SCAN-calculated Pourbaix decomposition diagram (0.35 VRHE)14 for crystalline MoS2, there are minor discrepancies with the Mo onsets reported here. For all MoSx materials studied, these should arise from the higher presence of defects (i.e. Mo5+/6+ oxides) and the intrinsic structural differences compared to crystalline MoS2, besides the different concentrations of dissolved [Mox+] species used to calculate the thermodynamic equilibrium potentials (ca. 10-8 and 10-6 M, respectively). However, the positively shifted Mo onsets upon repetitive oxidative cycling indicate a stabilization of the Mo centers which cannot be explained by the previous hypotheses alone.

To gather further insights on the surface oxidation states before/after electro-oxidative cycling, ex-situ XPS measurements were performed on the [Mo3S13]2- and MoSx-N-CNT catalysts (Figures S12 and S13, respectively)15. As foreseen, an increased presence of oxidized Mo5+OxSy/Mo6+ surface species was observed: 11 at. % vs. 4.5 % in pristine [Mo3S13]2-; 17 at. % vs. 3.9 % in pristine MoSx-N-CNT. Additionally, the relative contribution of the S22-/S2- species in the S 2*p* spectra was modified. The lower binding energy spin-orbit doublet 2*p 3/2:1/2* ascribed to terminal S22- (S22-term) and/or unsaturated S2- (S2-unsat) is less prominent after electro-oxidation than the high-binding energy doublet related to bridging S22- (S22-bridg) and apical S2- (S2-ap). The relative loss of the S22-term/S2-unsat doublet (expressed as a ratio S22-term/S2-unsat: S22-bridg/ S2-ap, after testing vs. pristine) is 40:60 vs. 49:51 at. % for [Mo3S13]2- and 41:59 vs. 49:51 at. % for MoSx-N-CNT. Such preferential oxidation of the weakly-bound, more readily-oxidized low binding S moieties was previously found for a-MoS3-x materials after partial anodic stripping9 and ascribed to S22-term loss16.

Galvanostatic holds at oxidative potentials (+1 mA cm-2, 10 mins) further corroborated that the increased Mo5+OxSy/Mo6+ surface contents and S22-term/S2-unsat loss are linked to the harshness of the electro-oxidative protocol (Figure S12-13). Thus, we believe that the stabilization of [Mo3S13]-based catalysts under anodic potentials lies in the selective conversion of S22-term to S2-/SOxy- via a 1 H+: 2e- proton-coupled electron transfer mechanism as proposed for pristine *a*-MoS3-x17 and crystalline MoS218. Beyond the 0.3 VRHE Mo onset potential, the readily oxidized S22-term would yield undercoordinated Mo sites, which can then electro-oxidize by forming Mo-O or Mo=O bonds but would be ultimately limited by the depletion of S22-term sites. Beyond a certain potential threshold, proposed here to be > 1.1 VRHE, the remaining S groups would electro-oxidize facilitating the further oxidation of Mo sites to MoO2/MoO3 and ultimately HMoO4-. For *c*-MoS2, the earlier electro-oxidation could arise from the higher relative contents of the oxidation-prone S22-term ligands in the structure, closer to that of crystalline MoS2 which should oxidize at earlier potentials.





**Figure S11.** Online ICP-MS dissolution data recorded for Mo (blue, upper pane) and S (yellow, lower pane) under a galvanostatic anodic hold (+1 mA cm-2geom, 10 mins) exerted to a) pristine and b) N-CNT anchored [Mo3S13]2- catalyst.







**Figure S12.** High-resolution Mo 3d (top) and S 2p (bottom) XPS spectra of pristine [Mo3S13]2- before electrochemistry (I, left), after electro-oxidative cycling (II, center), and after a +1 mA cm-2 galvanostatic hold (III, right). Labels: cumulative peak fit (black), Mo4+ 3d5/2:3/2 (light blue), MoaObSc 3d5/2:3/2 (blue), Mo6+ 3d5/2:3/2 (dark blue), S 2p3/2:1/2 (S2-, yellow), S 2p3/2:1/2 (S22-, orange) and S 2p3/2:1/2 (SOxy-, red).







**Figure S13.** High-resolution Mo 3d (top) and S 2p (bottom) XPS spectra of Mo3S13-NCNT before electrochemistry (I, left), after electro-oxidative cycling (II, center), and after a +1 mA cm-2 galvanostatic hold (III, right). Labels: cumulative peak fit (black), Mo4+ 3d5/2:3/2 (light blue), MoaObSc 3d5/2:3/2 (blue), Mo6+ 3d5/2:3/2 (dark blue), S 2p3/2:1/2 (S2-, yellow), S 2p3/2:1/2 (S22-, orange) and S 2p3/2:1/2 (SOxy-, red).

**Section S3: Hydrogen evolution and dissolution pathways under HER potentials**

The redox processes responsible for the electrocatalytic activity in *c*-MoS2 and *a*-MoS3-x, based upon the hypothesis of the Mo-H active site universality postulated by Bau et al.,19 along with the dissolution pathways proposed in this work are as follows:

**S3.1 Anodically-electrodeposited MoSx thin films (*a*-MoS3-x)**

For ease of convenience, Scheme 2 does not include the electrochemical loss of apical S2- (S2-ap) moieties, shown as follows

This process can take place alongside with the terminal S22- (S22-term) loss, which is postulated to be responsible for the appearance of the Mo3+ hydride sites and ultimately the HER activity

Alternatively, based on previous work by Tran et al.,20 a Mo5+ hydride pathway could also be responsible for the HER electrocatalytic activity

Finally, two redox processes are proposed to be responsible for the observed Mo dissolution at cathodic potentials

Or

**S3.2 Cathodically-electrodeposited MoSx thin films (*c*-MoS2)**

An analogous HER mechanism can be proposed for *c*-MoS2, triggered in this case by unsaturated S2- (S2-unsat) loss

Finally, two redox processes are proposed to be responsible for the observed Mo dissolution at cathodic potentials

Or





**Figure S14.** Online ICP-MS dissolution data obtained for c-MoS2 (left) and a-MoS3-x (right) during sequential galvanostatic holds with increasing cathodic geometric current density (jgeom= -1, -2, -5 mA cm-2, 2 min) values for Mo (blue) and S (yellow). Potentiostatic holds at 0 VRHE (8 mins) are employed here to resolve dissolution signals at 0 V vs. RHE.








**Figure S15.** Compilation of S-numbers obtained for c-MoS2 and a-MoS3-x during sequential galvanostatic holds for Mo (top) and S (bottom) under HER conditions (left) and S-numbers(e-) during 0V vs. RHE holds (right).








**Figure S16.** Online ICP-MS dissolution data obtained for sequential galvanostatic holds with increasing cathodic geometric current density (jgeom= -1, -2, -5 , -10 mA cm-2, 2 min) values for Mo (blue) and S (yellow). Potentiostatic holds at 0 VRHE (8 mins) are employed here to resolve dissolution signals at 0 V vs. RHE.








**Figure S17.** Compilation of S-numbers obtained for a-MoS3-x, [Mo3S13]2- and [Mo3S13]-N-CNTs during sequential galvanostatic holds for Mo (top) and S (bottom) under HER conditions (left) and S-numbers(e-) during 0V vs. RHE holds (right).

| HER pre-conditioning | MoSx catalyst | Peak current density, first cycle / mA cm-2 | Peak current density, last cycle / mA cm-2 |
| --- | --- | --- | --- |
| 100 CVs,  0 to -0.25 V vs. RHE | *c*-MoS2 | -0.60±0.08 | -0.48±0.03 |
| *a*-MoS3-x | -0.8±0.4 | -7.6±0.6 |
| 150 CVs,  0 to -0.2 V vs. RHE | [Mo3S13]2- | -0.137±0.005 | -0.09±0.006 |
| Mo3S13-N-CNT | -1.22±0.02 | -2.09±0.05 |
| *a*-MoS3-x | -0.7±0.2 | -1±0.3 |

**Table S1.** Compilation of peak current densities recording during potentiodynamic cycling at the first and last cycles.

| HER pre-conditioning | MoSx catalyst | S-to-Mo ratio, pre-HER  theoretical (XPS) | S-to-Mo ratio, ICP-MS post-HER | S-to-Mo ratio, post-HER  XPS |
| --- | --- | --- | --- | --- |
| 100 CVs,  0 to -0.25 V vs. RHE | *c*-MoS2 | 2 (1.5) | 2.0035±0.0007 | - |
| *a*-MoS3-x | 3 (2.8) | 2.995±0.007 | - |
| 150 CVs,  0 to -0.2 V vs. RHE | [Mo3S13]2- | 4.333 (4.151) | 4.3435±0.0001 | 2.75 |
| Mo3S13-N-CNT | 4.333 (4.193) | 4.525±0.004 | 1.58 |
| *a*-MoS3-x | 3 (2.8) | ? | - |

**Table S2.** Compilation of S-to-Mo ratios expected for all MoSx catalysts in their pristine state, and values obtained after a back-of-the-envelope calculation based on Mo/S relative dissolution versus initial loadings detected downstream after completion of the start-up/shut-down HER stress tests, and post-mortem ex-situ XPS.

**References**

1. Merki D, Fierro S, Vrubel H, Hu X. Amorphous molybdenum sulfide films as catalysts for electrochemical hydrogen production in water. *Chem Sci* **2**, 1262-1267 (2011).

2. Bélanger D, Laperriére G, Marsan B. The electrodeposition of amorphous molybdenum sulfide. *Journal of Electroanalytical Chemistry* **347**, 165-183 (1993).

3. Redman DW, Rose MJ, Stevenson KJ. Electrodeposition of Amorphous Molybdenum Chalcogenides from Ionic Liquids and Their Activity for the Hydrogen Evolution Reaction. *Langmuir* **33**, 9354-9360 (2017).

4. Chia X, Sutrisnoh NAA, Pumera M. Tunable Pt-MoS (x) Hybrid Catalysts for Hydrogen Evolution. *ACS Appl Mater Interfaces* **10**, 8702-8711 (2018).

5. Wang HW, Skeldon P, Thompson GE. XPS studies of MoS2 formation from ammonium tetrathiomolybdate solutions. *Surface and Coatings Technology* **91**, 200-207 (1997).

6. Vrubel H, Hu X. Growth and Activation of an Amorphous Molybdenum Sulfide Hydrogen Evolving Catalyst. *ACS Catalysis* **3**, 2002-2011 (2013).

7. Weber T, Muijsers JC, Niemantsverdriet JW. Structure of Amorphous MoS3. *Journal of Physical Chemistry* **99**, 9194-9200 (1995).

8. Morales-Guio CG, Hu X. Amorphous molybdenum sulfides as hydrogen evolution catalysts. *Acc Chem Res* **47**, 2671-2681 (2014).

9. Ting LRL, Deng Y, Ma L, Zhang Y-J, Peterson AA, Yeo BS. Catalytic Activities of Sulfur Atoms in Amorphous Molybdenum Sulfide for the Electrochemical Hydrogen Evolution Reaction. *ACS Catalysis* **6**, 861-867 (2016).

10. Mabayoje O*, et al.* Electrodeposition of MoS(x) Hydrogen Evolution Catalysts from Sulfur-Rich Precursors. *ACS Appl Mater Interfaces* **11**, 32879-32886 (2019).

11. Iffelsberger C, Pumera M. High resolution electrochemical additive manufacturing of microstructured active materials: case study of MoSxas a catalyst for the hydrogen evolution reaction. *Journal of Materials Chemistry A* **9**, 22072-22081 (2021).

12. Speck FD*, et al.* Atomistic Insights into the Stability of Pt Single-Atom Electrocatalysts. *J Am Chem Soc* **142**, 15496-15504 (2020).

13. Brookins DG. *Eh-pH Diagrams for Geochemistry*. Springer-Verlag (1987).

14. Wang Z*, et al.* Origins of the Instability of Nonprecious Hydrogen Evolution Reaction Catalysts at Open-Circuit Potential. *ACS Energy Letters* **6**, 2268-2274 (2021).

15. Holzapfel PKR*, et al.* Fabrication of a Robust PEM Water Electrolyzer Based on Non-Noble Metal Cathode Catalyst: [Mo(3) S(13) ](2-) Clusters Anchored to N-Doped Carbon Nanotubes. *Small* **16**, e2003161 (2020).

16. Nguyen DN, Nguyen LN, Nguyen PD, Thu TV, Nguyen AD, Tran PD. Crystallization of Amorphous Molybdenum Sulfide Induced by Electron or Laser Beam and Its Effect on H2-Evolving Activities. *The Journal of Physical Chemistry C* **120**, 28789-28794 (2016).

17. Escalera-López D, Lou Z, Rees NV. Benchmarking the Activity, Stability, and Inherent Electrochemistry of Amorphous Molybdenum Sulfide for Hydrogen Production. *Advanced Energy Materials* **9**, (2019).

18. Bonde J, Moses P, Jaramillo TF, Norskov J, Chorkendorff I. Hydrogen evolution on nano-particulate transition metal sulfides. *Faraday Discuss* **140**, 219-231 (2009).

19. Bau JA, Emwas A-H, Nikolaienko P, Aljarb AA, Tung V, Rueping M. Mo3+ hydride as the common origin of H2 evolution and selective NADH regeneration in molybdenum sulfide electrocatalysts. *Nature Catalysis* **5**, 397-404 (2022).

20. Tran PD*, et al.* Coordination polymer structure and revisited hydrogen evolution catalytic mechanism for amorphous molybdenum sulfide. *Nat Mater* **15**, 640-646 (2016).
